# Supplementary material
Source: HighWire-hosted journal article supplement (https://bjsm.bmj.com/content/58/14/777)
Supplement: inline-supplementary-material-1 [file inline-supplementary-material-1.pdf]

CENT flow diagram

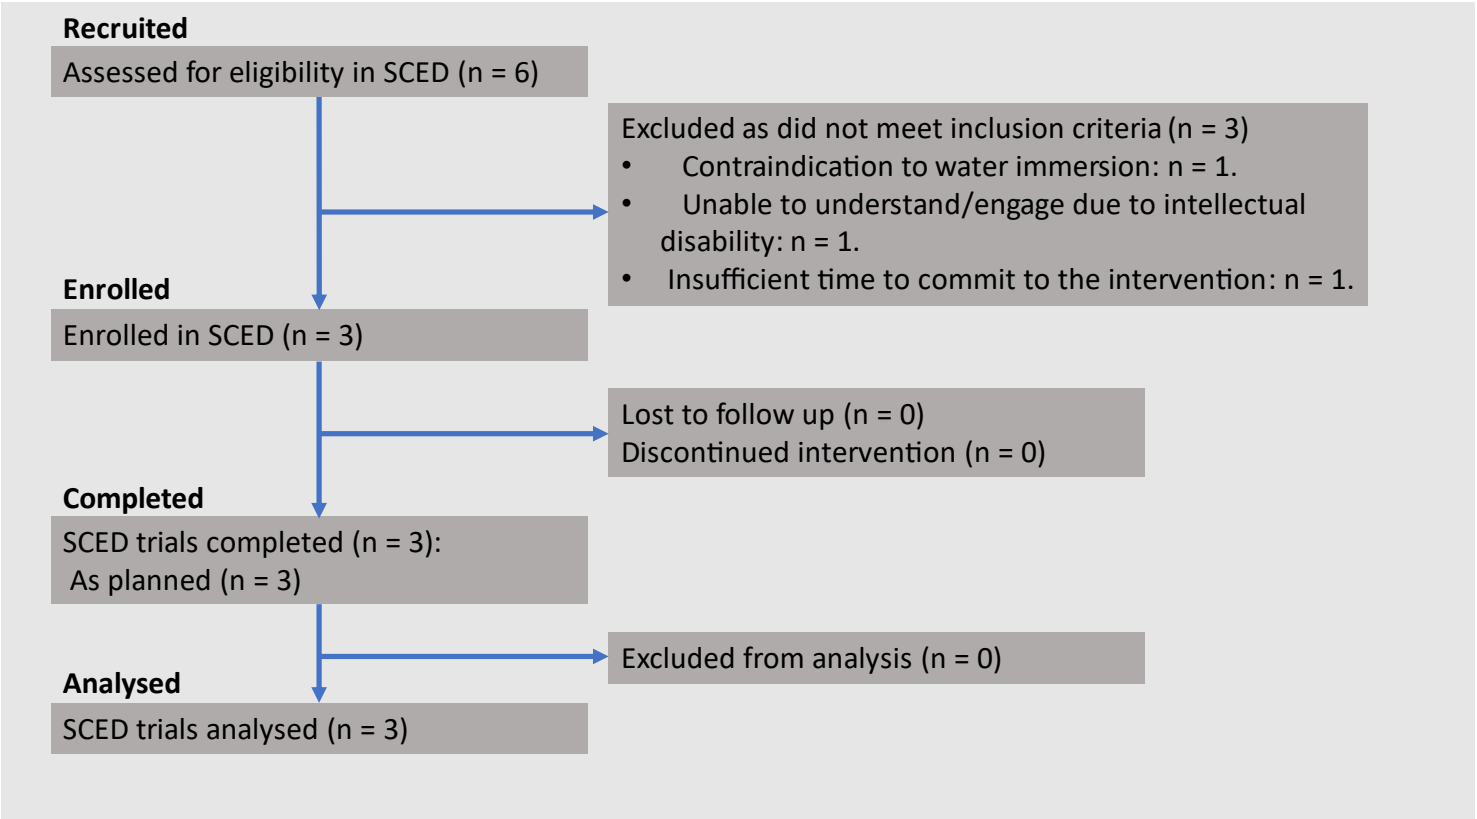

Appendix 1: CENT flow diagram for MB-SCED study, adapted from CONSORT flow diagram, as per CENT guidelines[1]

1. Vohra, S., et al., *CONSORT extension for reporting N-of-1 trials (CENT) 2015 Statement*. BMJ, 2015. **350**(may14 17): p. h1738-h1738.
